# Supplementary material for: Syntopic frogs reveal different patterns of interaction with the landscape: A comparative landscape genetic study of Pelophylax nigromaculatus and Fejervarya limnocharis from central China
Source: PubMed Central journal article supplement (PMC5696414; doi:10.1002/ece3.3459), 2017-10-04
Supplement: ECE3-7-9294-s001.pdf [file ECE3-7-9294-s001.pdf]

**Appendix S1.** Characteristics of microsatellite loci and primers used for *Pelophylax nigromaculatus* and *Fejervarya limnocharis*

| <b>Locus</b>             | <b>Primer sequences (5' – 3')</b>                      | <b>Repeat motif</b> | <b>Ta (°C)</b> | <b>Allele size/range</b> |
|--------------------------|--------------------------------------------------------|---------------------|----------------|--------------------------|
| <i>P. nigromaculatus</i> |                                                        |                     |                |                          |
| *Rnh-4                   | F: CGCTTACTATGGGGGGATA<br>R: GCCTGAGAAGGGTGGTGCT       | (GA) <sub>5</sub>   | 62             | 154–166                  |
| *Rnh-10                  | F: AGTGCAACATCAACTTGGGTG<br>R: GCAGAGTCGCTGTCGGGA      | (GCT) <sub>6</sub>  | 62             | 165–246                  |
| *Rnh-9                   | F: GCACAGTTAGCGAGATGGA<br>R: CTCCTAGAGCTGGGTGGTAT      | (GCA) <sub>7</sub>  | 59             | 155–185                  |
| *Rnh-6                   | F: TCTCGGGAGGAAAGCAATGG<br>R: AAGGAGCCTGGGACTATGGTAAAC | (AAC) <sub>5</sub>  | 62             | 208–214                  |
| *Rnh-13                  | F: GATACGGGAGGCAAACG<br>R: TCCACAGCCCAGCACTC           | (GCA) <sub>5</sub>  | 56             | 144–150                  |
| †JS01-D6                 | F: TGTGGTCAGATAAGTAGGGT<br>R: CCAGGACACTTATGTAGGTT     | (CA) <sub>11</sub>  | 55             | 152–186                  |
| †JS01-G11                | F: GCTCTCCTATGACTCACCC<br>R: GCAAGCAGTGGTGTAAGTG       | (CA) <sub>15</sub>  | 55             | 132–186                  |
| †JS01-B3                 | F: GTGTGAGTATTTGTATGTGG<br>R: CAGGAGTATGTAATGAGCAG     | (TG) <sub>18</sub>  | 55             | 146–178                  |
| †JS01-A6                 | F: AGGTTCCCTTTAAGGGCTC                                 | (CA) <sub>13</sub>  | 55             | 160–182                  |

R: GGGGTTTCATTTCTGCTG

*F. limnocharis*

|              |                                 |                                         |    |         |
|--------------|---------------------------------|-----------------------------------------|----|---------|
| ^Fej_ccmb_02 | F: GGAGGAATGGGGGGGGGATGT        | (CA) <sub>21</sub>                      | 58 | 130–156 |
|              | R: TGCACACATACTGACACATACACAAATA |                                         |    |         |
| ^Fej_ccmb_03 | F: TTCCCTCTCCCTCTTCTCTTCCAC     | (AC) <sub>9</sub>                       | 57 | 194–201 |
|              | R: ACGGGATGAATGGGCTGAACTG       |                                         |    |         |
| ^Fej_ccmb_04 | F: TTGCGTTGGTTATGTGTAGGTGC      | (GT) <sub>30</sub>                      | 57 | 87–215  |
|              | R: GTCCATTAAGTACGAAAAACAGTCC    |                                         |    |         |
| †LX001-B9    | F: AGCATTCAATATCAGGCAGCAG       | (CA) <sub>17</sub>                      | 64 | 164–232 |
|              | R: GTGCGCGTGTGTCTTTGTATATA      |                                         |    |         |
| †LX001-A7    | F: GGGACAGAAATACTGATGATG        | (CA) <sub>13</sub>                      | 63 | 156–170 |
|              | R: GTAGACCTTAGAGCAGAAGC         |                                         |    |         |
| †LX001-G10-2 | F: GCTCATAACAGGCAGCATTG         | (CA) <sub>13</sub> ...(CA) <sub>9</sub> | 64 | 188–210 |
|              | R: CTTCTCCATTTTGTGACCAG         |                                         |    |         |
| †LX001-H10   | F: AGAATGTTCCCTTGCCCTTTAGG      | (CA) <sub>14</sub>                      | 62 | 132-150 |
|              | R: TGACCGTCTGTGTGTGACTGTCAG     |                                         |    |         |

---

Primers originally developed in this study<sup>†</sup>, by Gong *et al.* (2010)\*, and by Aggarwal *et al.* (2012)<sup>^</sup>. Ta = annealing temperature.
