# Supplementary material for: Syntopic frogs reveal different patterns of interaction with the landscape: A comparative landscape genetic study of Pelophylax nigromaculatus and Fejervarya limnocharis from central China
Source: PubMed Central journal article supplement (PMC5696414; doi:10.1002/ece3.3459), 2017-10-04
Supplement: ECE3-7-9294-s002.pdf [file ECE3-7-9294-s002.pdf]

**Appendix S2.** Summary statistics of *Pelophylax nigromaculatus* at nine microsatellite loci for eight sampling sites.  $N_A$  = number of alleles,  $H_O$  = observed heterozygosity,  $H_E$  = expected heterozygosity,  $n$  = number of samples for each sampling site,  $P_{HWE}$  = p value from Hardy-Weinberg equilibrium test

| Sampling site           | Rhh-4 | D6    | Rnh-10 | G11   | Rnh-9 | Rnh-6 | Rnh-13 | B3    | A6    | Mean (by site) |
|-------------------------|-------|-------|--------|-------|-------|-------|--------|-------|-------|----------------|
| <b>Site #1 (n = 30)</b> |       |       |        |       |       |       |        |       |       |                |
| $N_A$                   | 5     | 11    | 5      | 9     | 7     | 2     | 2      | 3     | 6     | 5.556          |
| $H_O$                   | 0.633 | 0.500 | 0.414  | 0.500 | 0.767 | 0.133 | 0.000  | 0.143 | 0.267 | 0.373          |
| $H_E$                   | 0.776 | 0.810 | 0.572  | 0.847 | 0.667 | 0.282 | 0.066  | 0.543 | 0.731 | 0.588          |
| $P_{HWE}$               | 0.031 | 0.000 | 0.037  | 0.000 | 0.560 | 0.016 | 0.017  | 0.000 | 0.000 |                |
| <b>Site #2 (n = 57)</b> |       |       |        |       |       |       |        |       |       |                |
| $N_A$                   | 6     | 10    | 8      | 6     | 5     | 3     | 4      | 6     | 9     | 6.333          |
| $H_O$                   | 0.614 | 0.482 | 0.561  | 0.519 | 0.554 | 0.286 | 0.421  | 0.351 | 0.446 | 0.470          |
| $H_E$                   | 0.728 | 0.595 | 0.568  | 0.727 | 0.639 | 0.528 | 0.577  | 0.791 | 0.851 | 0.667          |
| $P_{HWE}$               | 0.050 | 0.010 | 0.188  | 0.002 | 0.068 | 0.000 | 0.026  | 0.000 | 0.000 |                |
| <b>Site #3 (n = 27)</b> |       |       |        |       |       |       |        |       |       |                |
| $N_A$                   | 4     | 2     | 6      | 7     | 3     | 2     | 2      | 6     | 3     | 3.889          |
| $H_O$                   | 0.731 | 0.038 | 0.360  | 0.304 | 0.462 | 0.250 | 0.269  | 0.385 | 0.240 | 0.338          |
| $H_E$                   | 0.673 | 0.111 | 0.598  | 0.499 | 0.637 | 0.337 | 0.238  | 0.716 | 0.284 | 0.455          |
| $P_{HWE}$               | 0.038 | 0.058 | 0.001  | 0.001 | 0.029 | 0.233 | 1.000  | 0.001 | 0.481 |                |
| <b>Site #4 (n = 63)</b> |       |       |        |       |       |       |        |       |       |                |
| $N_A$                   | 5     | 3     | 10     | 8     | 2     | 4     | 2      | 5     | 7     | 5.111          |
| $H_O$                   | 0.698 | 0.413 | 0.587  | 0.542 | 0.317 | 0.250 | 0.435  | 0.540 | 0.475 | 0.473          |
| $H_E$                   | 0.620 | 0.405 | 0.688  | 0.512 | 0.311 | 0.470 | 0.475  | 0.768 | 0.487 | 0.526          |
| $P_{HWE}$               | 0.069 | 1.000 | 0.100  | 0.045 | 1.000 | 0.000 | 0.592  | 0.000 | 0.802 |                |
| <b>Site #5 (n = 51)</b> |       |       |        |       |       |       |        |       |       |                |
| $N_A$                   | 4     | 5     | 9      | 6     | 3     | 3     | 2      | 9     | 6     | 5.222          |
| $H_O$                   | 0.800 | 0.360 | 0.660  | 0.318 | 0.510 | 0.362 | 0.102  | 0.400 | 0.229 | 0.416          |
| $H_E$                   | 0.721 | 0.505 | 0.810  | 0.437 | 0.506 | 0.488 | 0.098  | 0.760 | 0.412 | 0.526          |
| $P_{HWE}$               | 0.311 | 0.014 | 0.042  | 0.033 | 1.000 | 0.084 | 1.000  | 0.000 | 0.001 |                |
| <b>Site #6 (n = 50)</b> |       |       |        |       |       |       |        |       |       |                |
| $N_A$                   | 5     | 6     | 11     | 9     | 4     | 3     | 2      | 8     | 5     | 5.889          |
| $H_O$                   | 0.580 | 0.543 | 0.596  | 0.721 | 0.638 | 0.341 | 0.125  | 0.480 | 0.447 | 0.497          |
| $H_E$                   | 0.677 | 0.611 | 0.820  | 0.802 | 0.649 | 0.603 | 0.189  | 0.807 | 0.654 | 0.646          |
| $P_{HWE}$               | 0.036 | 0.062 | 0.000  | 0.016 | 0.151 | 0.001 | 0.064  | 0.000 | 0.001 |                |
| <b>Site #7 (n = 47)</b> |       |       |        |       |       |       |        |       |       |                |
| $N_A$                   | 6     | 8     | 15     | 7     | 4     | 3     | 2      | 8     | 6     | 6.556          |
| $H_O$                   | 0.652 | 0.422 | 0.822  | 0.659 | 0.413 | 0.348 | 0.341  | 0.256 | 0.318 | 0.470          |
| $H_E$                   | 0.745 | 0.608 | 0.847  | 0.786 | 0.620 | 0.473 | 0.342  | 0.840 | 0.734 | 0.666          |
| $P_{HWE}$               | 0.077 | 0.018 | 0.155  | 0.027 | 0.000 | 0.003 | 1.000  | 0.000 | 0.000 |                |
| <b>Site #8 (n = 46)</b> |       |       |        |       |       |       |        |       |       |                |
| $N_A$                   | 6     | 11    | 14     | 21    | 5     | 3     | 2      | 10    | 12    | 9.333          |
| $H_O$                   | 0.378 | 0.262 | 0.711  | 0.429 | 0.614 | 0.200 | 0.457  | 0.261 | 0.273 | 0.398          |
| $H_E$                   | 0.736 | 0.876 | 0.860  | 0.941 | 0.759 | 0.541 | 0.500  | 0.824 | 0.881 | 0.769          |
| $P_{HWE}$               | 0.000 | 0.000 | 0.009  | 0.000 | 0.386 | 0.000 | 0.765  | 0.000 | 0.000 |                |
| <b>Mean (by locus)</b>  |       |       |        |       |       |       |        |       |       |                |
| $N_A$                   | 5.125 | 7     | 9.75   | 9.125 | 4.125 | 2.875 | 2.25   | 6.875 | 6.75  | -              |
| $H_E$                   | 0.709 | 0.565 | 0.720  | 0.694 | 0.599 | 0.465 | 0.310  | 0.756 | 0.629 | -              |

\*No pair of loci are in linkage disequilibrium for the majority of populations.
