# Supplementary material for: Syntopic frogs reveal different patterns of interaction with the landscape: A comparative landscape genetic study of Pelophylax nigromaculatus and Fejervarya limnocharis from central China
Source: PubMed Central journal article supplement (PMC5696414; doi:10.1002/ece3.3459), 2017-10-04
Supplement: ECE3-7-9294-s003.pdf [file ECE3-7-9294-s003.pdf]

**Appendix S3.** Summary statistics of *Fejervarya limnocharis* at nine microsatellite loci for eight sampling sites.  $N_A$  = number of alleles,  $H_O$  = observed heterozygosity,  $H_E$  = expected heterozygosity,  $n$  = number of samples for each sampling site,  $P_{HWE}$  = p value from Hardy-Weinberg equilibrium test

| Collection site         | Fej_ccmb_03 | A7    | Fej_ccmb_04 | G10-2 | Fej_ccmb_02 | H10   | B9    | Mean (by site) |
|-------------------------|-------------|-------|-------------|-------|-------------|-------|-------|----------------|
| <b>Site #1 (n = 57)</b> |             |       |             |       |             |       |       |                |
| $N_A$                   | 1           | 1     | 1           | 4     | 2           | 4     | 16    | 4.142857       |
| $H_O$                   | N/A         | N/A   | N/A         | 0.127 | 0.018       | 0.179 | 0.291 | 0.087857       |
| $H_E$                   | N/A         | N/A   | N/A         | 0.475 | 0.018       | 0.608 | 0.882 | 0.283286       |
| $P_{HWE}$               | N/A         | N/A   | N/A         | 0.000 | 1.000       | 0.000 | 0.000 |                |
| <b>Site #2 (n = 40)</b> |             |       |             |       |             |       |       |                |
| $N_A$                   | 1           | 2     | 1           | 5     | 2           | 3     | 10    | 3.428571       |
| $H_O$                   | N/A         | 0.200 | N/A         | 0.111 | 0.125       | 0.125 | 0.611 | 0.167429       |
| $H_E$                   | N/A         | 0.380 | N/A         | 0.565 | 0.339       | 0.522 | 0.767 | 0.367514       |
| $P_{HWE}$               | N/A         | 0.006 | N/A         | 0.000 | 0.000       | 0.000 | 0.013 |                |
| <b>Site #3 (n = 72)</b> |             |       |             |       |             |       |       |                |
| $N_A$                   | 1           | 2     | 2           | 9     | 2           | 4     | 8     | 4              |
| $H_O$                   | N/A         | 0.211 | 0.082       | 0.357 | 0.104       | 0.211 | 0.366 | 0.190257       |
| $H_E$                   | N/A         | 0.359 | 0.192       | 0.818 | 0.223       | 0.580 | 0.422 | 0.370557       |
| $P_{HWE}$               | N/A         | 0.001 | 0.001       | 0.000 | 0.000       | 0.000 | 0.120 |                |
| <b>Site #4 (n = 50)</b> |             |       |             |       |             |       |       |                |
| $N_A$                   | 1           | 2     | 1           | 4     | 2           | 3     | 6     | 2.714286       |
| $H_O$                   | N/A         | 0.100 | N/A         | 0.267 | 0.042       | 0.149 | 0.560 | 0.159601       |
| $H_E$                   | N/A         | 0.489 | N/A         | 0.655 | 0.281       | 0.489 | 0.659 | 0.367471       |
| $P_{HWE}$               | N/A         | 0.000 | N/A         | 0.000 | 0.000       | 0.000 | 0.369 |                |
| <b>Site #5 (n = 52)</b> |             |       |             |       |             |       |       |                |
| $N_A$                   | 1           | 2     | 1           | 5     | 2           | 5     | 7     | 3.285714       |
| $H_O$                   | N/A         | 0.135 | N/A         | 0.100 | 0.020       | 0.060 | 0.314 | 0.089747       |
| $H_E$                   | N/A         | 0.160 | N/A         | 0.588 | 0.020       | 0.627 | 0.391 | 0.255084       |
| $P_{HWE}$               | N/A         | 0.314 | N/A         | 0.000 | 1.000       | 0.000 | 0.034 |                |
| <b>Site #6 (n = 54)</b> |             |       |             |       |             |       |       |                |
| $N_A$                   | 1           | 1     | 2           | 4     | 2           | 4     | 10    | 3.428571       |
| $H_O$                   | N/A         | N/A   | 0.019       | 0.250 | 0.074       | 0.037 | 0.593 | 0.138947       |
| $H_E$                   | N/A         | N/A   | 0.019       | 0.732 | 0.138       | 0.206 | 0.705 | 0.257241       |
| $P_{HWE}$               | N/A         | N/A   | 1.000       | 0.000 | 0.018       | 0.000 | 0.040 |                |
| <b>Site #7 (n = 52)</b> |             |       |             |       |             |       |       |                |
| $N_A$                   | 1           | 1     | 2           | 8     | 2           | 6     | 20    | 5.714286       |
| $H_O$                   | N/A         | N/A   | 0.125       | 0.308 | 0.019       | 0.115 | 0.529 | 0.156614       |
| $H_E$                   | N/A         | N/A   | 0.118       | 0.614 | 0.057       | 0.457 | 0.919 | 0.309276       |
| $P_{HWE}$               | N/A         | N/A   | 1.000       | 0.000 | 0.029       | 0.000 | 0.000 |                |
| <b>Site #8 (n = 55)</b> |             |       |             |       |             |       |       |                |
| $N_A$                   | 1           | 4     | 3           | 12    | 2           | 7     | 21    | 7.142857       |
| $H_O$                   | N/A         | 0.380 | 0.109       | 0.479 | 0.059       | 0.265 | 0.373 | 0.237913       |
| $H_E$                   | N/A         | 0.508 | 0.105       | 0.894 | 0.058       | 0.629 | 0.938 | 0.447317       |
| $P_{HWE}$               | N/A         | 0.004 | 1.000       | 0.000 | 1.000       | 0.000 | 0.000 |                |
| <b>Mean (by locus)</b>  |             |       |             |       |             |       |       |                |
| $N_A$                   | 1           | 1.875 | 1.625       | 6.375 | 2           | 4.5   | 12.25 | -              |
| $H_E$                   | N/A         | 0.237 | 0.054       | 0.668 | 0.142       | 0.515 | 0.710 | -              |

\*No pair of loci are in linkage disequilibrium for the majority of populations.

†Hardy-Weinberg equilibrium tests were not performed for monomorphic loci and were marked N/A.
