# Supplementary material for: Syntopic frogs reveal different patterns of interaction with the landscape: A comparative landscape genetic study of Pelophylax nigromaculatus and Fejervarya limnocharis from central China
Source: PubMed Central journal article supplement (PMC5696414; doi:10.1002/ece3.3459), 2017-10-04

**(A)**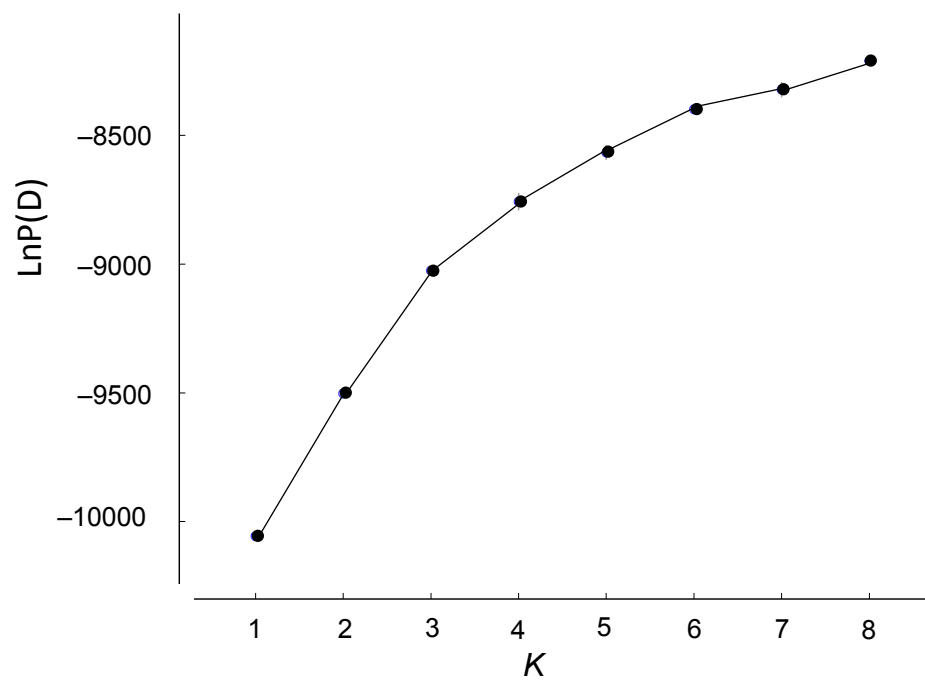**(B)**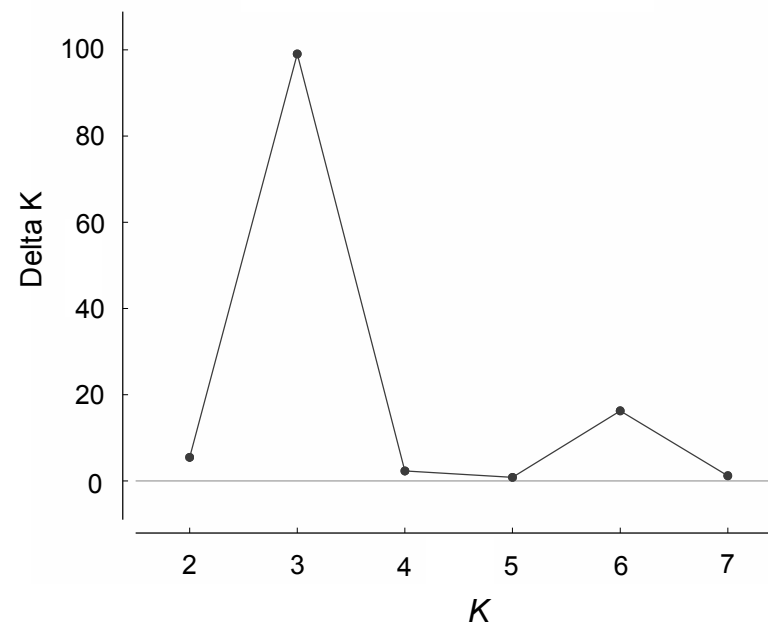**(C)**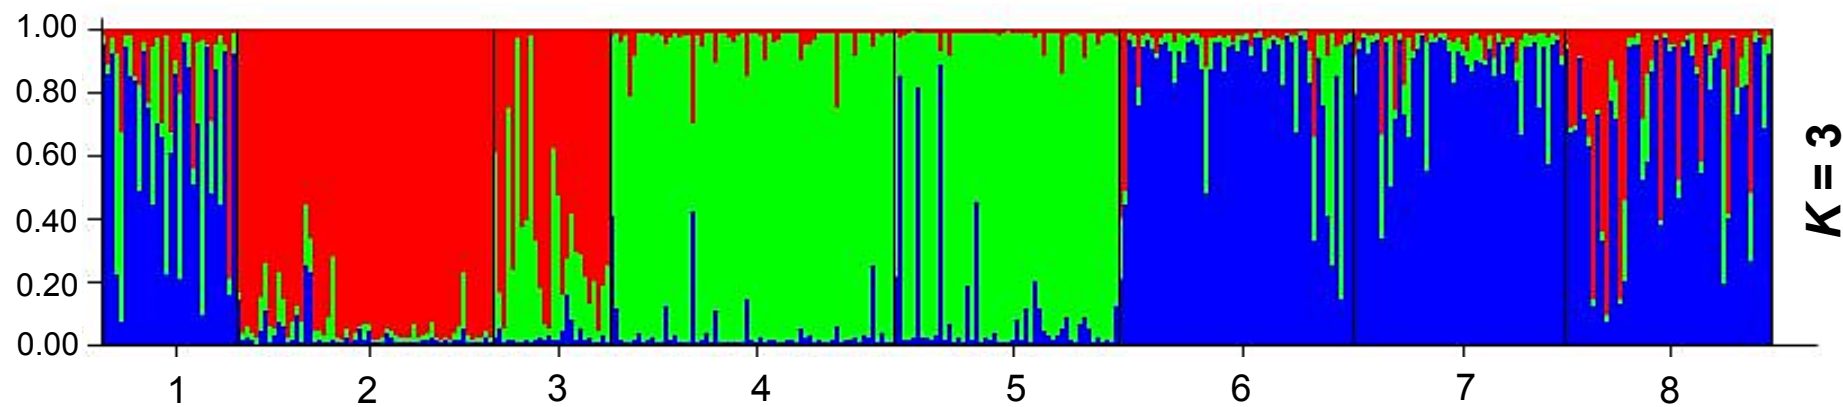

Supplement: ECE3-7-9294-s004.pdf [file ECE3-7-9294-s004.pdf]
